# Supplementary material for: Influence of atmospheric conditions on the role of trifluoroaceticacid in atmospheric sulfuric acid-dimethylamine nucleation
Source: Copernicus journal article supplement (doi:10.5194/acp-2020-1186), 2020-12-18
Supplement: Supplementary file [file acp-2020-1186-AC2-supplement.pdf]

## Responses to Referee #2's comments

We are grateful to the reviewers for their valuable and helpful comments on our manuscript “**Influence of atmospheric conditions on the role of trifluoroacetic acid in atmospheric sulfuric acid-dimethylamine nucleation**” (MS No.: acp-2020-1186). We have revised the manuscript carefully according to reviewers' comments. The point-to-point responses to the Referee #2's comments are summarized below:

### **Referee Comments:**

The Study of Liu et al. report the influence of atmospheric conditions on the role of a perfluorocarboxylic acid, namely trifluoroacetic acid (TFA) in sulfate-based aerosol formation. This study readily complements a previous study from the same authors (Lu et al. 2020) by extending the local atmospheric conditions to worldwide atmospheric conditions. They used density functional theory and dynamics simulation to show that the particle formation rate and the contributions of sulfuric acid – dimethylamine – TFA clusters to the cluster formation pathways can be effectively enhanced, especially in cold and mildly polluted regions. This study highlights the influence of the use of Freon alternatives on air quality and climate, and is of great interest for researchers in various fields within atmospheric and aerosol sciences. The study is well conducted and the approach is sound. I recommend publication in Atmospheric Chemistry and Physics after the comments below have been addressed.

**Response:** We would like to thank the reviewer for the positive and valuable comments, and we have revised our manuscript accordingly.

-----

### **General comments**

#### **Comment 1.**

It is well known from previous studies that plain SA-DMA clusters are insensitive to humidity. However, have the authors thought whether this situation may change if TFA is present in the cluster?

**Response:** According to the reviewer's suggestion, we now state in Lines 107-113 of the revised manuscript that “In addition, in order to evaluate the influence of relative humidity on the formation kinetics of SA-DMA-TFA system, the hydrated key clusters have also been studied. The relative hydrate distributions, the ratios of effective collision and evaporation coefficients weighted average over the hydrate distributions (Paasonen et al., 2012) and Cartesian coordinates of hydrated clusters are listed in Tables S5-S6, Table S7 and Table S8 in the Supplement, respectively. From the relevant detailed discussion shown in Section S1 in the Supplement, we can see that the stability of the studied SA-DMA-TFA clusters is insensitive to relative humidity, which is similar to the SA-DMA clusters (Olenius et al., 2017). Thus, only the unhydrated SA-DMA-TFA clusters are considered in the following discussion.”

Detailed analysis about the influence of humidity on the studied SA-DMA-TFA clusters has been shown in Section 1 of the revised Supplement that “From the ratios

of  $\beta \cdot C / \Sigma \gamma$  for the studied SA-DMA-TFA clusters (Fig. 1), it can be seen that the  $(SA)_2 \cdot (DMA)_3 \cdot (TFA)_1$  and  $(SA)_1 \cdot (DMA)_2 \cdot (TFA)_1$  clusters are relatively stable against evaporation and can be able to grow into larger clusters. The  $(SA)_1 \cdot (DMA)_1 \cdot (TFA)_1$  cluster is the initial and key cluster to form  $(SA)_2 \cdot (DMA)_3 \cdot (TFA)_1$  and  $(SA)_1 \cdot (DMA)_2 \cdot (TFA)_1$  clusters as shown in Fig. 4, and this cluster formation pathway through  $(SA)_1 \cdot (DMA)_1 \cdot (TFA)_1$  involves a modest thermodynamic barrier shown by the previous study (Lu et al. 2020). Hence, the formation of  $(SA)_1 \cdot (DMA)_1 \cdot (TFA)_1$  cluster is the limiting step in SA-DMA-TFA new particle formation, which is similar to the analysis on the limiting step of  $(SA)_n \cdot (Base)_n$  system (Elm, 2017). Therefore, in order to understand the influence of relative humidity (RH) on the SA-DMA-TFA system, the evaluation the influence of RH on the formation kinetics of  $(SA)_1 \cdot (DMA)_1 \cdot (TFA)_1$  cluster is of significance. Herein, the kinetic property of hydrated clusters relevant to the formation of the hydrated  $(SA)_1 \cdot (DMA)_1 \cdot (TFA)_1$  clusters, which involves collisions of smaller clusters with monomers and evaporation of monomer from the larger cluster, has been studied. The relative hydrate distributions of the clusters (Tables S5-S6) and the effective collision and evaporation coefficients (Table S7) as the weighted average over the hydrate distributions (Paasonen et al., 2012) are calculated at 280 K and 260 K. The Cartesian coordinates of these studied hydrated clusters are listed in Table S8. The relative distributions of the unhydrated  $(SA)_1 \cdot (DMA)_1 \cdot (TFA)_1$  and  $(SA)_1 \cdot (DMA)_2 \cdot (TFA)_1$  clusters are more than 50%, which are higher than those of the corresponding hydrated clusters at different RHs (20%, 40%, 60%, 80%, and 100%) and different temperatures (280 K and 260 K). Hence, most of  $(SA)_1 \cdot (DMA)_1 \cdot (TFA)_1$  and  $(SA)_1 \cdot (DMA)_2 \cdot (TFA)_1$  clusters are unhydrated in the atmosphere. Furthermore, the ratios of effective collision frequencies with nucleation monomers versus total effective evaporation frequencies ( $\beta_{eff} C / \Sigma \gamma_{eff}$ ) of these two key clusters almost vary slightly within one order of magnitude at different RHs and different temperatures (Table S7). Therefore, the studied SA-DMA-TFA system is insensitive to the variation of humidity, which is similar to the SA-DMA system (Olenius et al., 2017).”

-----  
**Specific comments**

**Comment 2.**

- **Line 22:** Include much earlier references including references from the same author and his group.

**Response:** According to the reviewer’s suggestion, the relevant earlier references including references from the same author and his group have been added in Line 22 of the revised manuscript.

-----  
**Comment 3.**

- **Lines 22-23:** SA-DMA nucleation has been observed in various places around the World. Why do the authors choose to constrain this fact solely to the urban city, Shanghai, China?

**Response:** SA-DMA nucleation has indeed been observed in various places around the World. Thus, according to the reviewer’s suggestion, we have rephrased this

sentence in Lines 22-25 of the revised manuscript that “Although sulfuric acid (SA) - dimethylamine (DMA) nucleation mechanism has been observed in various places around the world (Yao et al., 2018; Deng et al., 2020; Brean et al., 2020), there were still a lot of species observed in the atmosphere but not be fully assigned molecular formulas because of their chemical complexity.”

-----

**Comment 4.**

**-Lines 24-25:** A number of studies have identified earlier that some species (including methane sulfonic acid, sulfamic acid and glyoxylic acid) may enhance SA-based particle formation as well. You could list some of these studies to further put your study aim into context.

**Response:** We now state in Lines 25-28 of the revised manuscript that “Previous studies have identified that some acids, such as methane sulfonic acid, sulfamic acid and glyoxylic acid, can enhance the SA-based particle formation (Bork et al., 2014; Li et al., 2018; Liu et al., 2017). However, other possible species that may potentially enhance the NPF rates and the corresponding nucleation mechanism still should be further explored.”

-----

**Technical corrections**

**Comment 5.**

**- Line 28:** “Due to the worldwide...” should be “Due to their worldwide...”

**Response:** “Due to the worldwide...” has been corrected as “Due to their worldwide...” in Line 31 of the revised manuscript.

-----

**Comment 6.**

**- Line 40:** “Whereas TFA...” should be “However, TFA...”

**Response:** “Whereas TFA...” has been corrected as “However, TFA...” in Line 43 of the revised manuscript.

-----

**Comment 7.**

**-Line 43:** “...with distances to the corresponding...” should be “...with distances to corresponding...”

**Response:** “...with distances to the corresponding...” has been corrected as “...with distances to corresponding...” in Line 46 of the revised manuscript.

-----

**Comment 8.**

**- Lines 76:** the publication year should be added to the reference Lu and Chen. No need to cite that same reference at line 78.

**Response:** The publication year has been added to the reference Lu and Chen in Line 79 of the revised manuscript. The same reference in Line 81 has been deleted in the revised manuscript.

-----

**Comment 9.**

**- Line 91:** “It shows that the  $\Delta G$  decreases...” should be “It shows that  $\Delta G$

decreases...”

**Response:** “It shows that the  $\Delta G$  decreases...” has been corrected as “It shows that  $\Delta G$  decreases...” in Line 92 of the revised manuscript.

-----

**Comment 10.**

- **Line 93:** “...a cluster with monomer molecule...” should be “...a cluster with monomer molecule...”

**Response:** “...a cluster with monomer molecule...” has been corrected as “...a cluster with monomer molecule...” in Line 94 of the revised manuscript.

-----

**Comment 11.**

-**Lines 100-102:** “The reason for this is that the influence of temperature variation on the evaporation coefficients ( $\gamma$ , where the temperature dependence is exponential (McGrath et al., 2012) is much greater than that on collision coefficients ( $\beta$ , where the dependence is in the square root of the temperature (McGrath et al., 2012)).” should be “The reason for this is that the influence of temperature variation on the evaporation coefficients ( $\gamma$ , where the temperature is in the exponential term (Eq. (3))) is much greater than that on collision coefficients ( $\beta$ , where the temperature is in the square root term (Eq. (2))).”

**Response:** According to the reviewer’s suggestion, “The reason for this is that the influence of temperature variation on the evaporation coefficients ( $\gamma$ , where the temperature dependence is exponential (McGrath et al., 2012) is much greater than that on collision coefficients ( $\beta$ , where the dependence is in the square root of the temperature (McGrath et al., 2012)).” has been corrected as “The reason for this is that the influence of temperature variation on the evaporation coefficients ( $\gamma$ , where the temperature is in the exponential term (Eq. (3))) is much greater than that on collision coefficients ( $\beta$ , where the temperature is in the square root term (Eq. (2))) (McGrath et al., 2012).” in Lines 101-103 of the revised manuscript.

-----

**Comment 12.**

-**Line 131:** “...most of the year.” should be “...most parts of the year.”

**Response:** “...most of the year.” has been corrected as “...most parts of the year.” in Line 142 of the revised manuscript.

-----

**Comment 13.**

-**Line 132:** “...This can be attributed to that the ...” should be “...This can be attributed to the fact that the ...”

**Response:** “...This can be attributed to that the ...” has been corrected as “...This can be attributed to the fact that the ...” in Line 143 of the revised manuscript.

-----

**Comment 14.**

-**Line 135:** “This can be attributed to that temperature in spring and winter is relatively lower than other time all the year-round, respectively.” should be “This can be attributed to the fact that the temperature in spring and in winter is relatively lower

than in other seasons all the year round.”

**Response:** “This can be attributed to that temperature in spring and winter is relatively lower than other time all the year-round, respectively.” has been corrected as “This can be attributed to the fact that the temperature in spring and in winter is relatively lower than in other seasons all the year round.” in Lines 146-147 of the revised manuscript.

-----

**Comment 15.**

**-Line 140:** “...at the common temperatures...” should be “...at common temperatures...”

**Response:** “...at the common temperatures...” has been corrected as “...at common temperatures...” in Line 152 of the revised manuscript.

-----

**Comment 16.**

**-Line 178:** Unit should be  $\text{cm}^{-3} \text{s}^{-1}$ .

**Response:** Unit has been corrected as “ $\text{cm}^{-3} \text{s}^{-1}$ ” in Line 190 of the revised manuscript.

-----

**Comment 17.**

**-Line 184-185:** “...in the polluted atmosphere are shown in Figs. S1 and S2 in the Supplement, respectively.” should be “...in the polluted atmosphere are respectively shown in Figs. S1 and S2 in the Supplement.”

**Response:** “...in the polluted atmosphere are shown in Figs. S1 and S2 in the Supplement, respectively.” has been corrected as “...in the polluted atmosphere are respectively shown in Figs. S1 and S2 in the Supplement.” in Lines 196-197 of the revised manuscript.

-----

**Comment 18.**

**-Line 195:** “...at the moderate value of...” should be “...at moderate values of...”

**Response:** “...at the moderate value of...” has been corrected as “...at moderate values of...” in Lines 207 of the revised manuscript.
